# Supplementary material
Source: Hindawi journal article supplement (doi:10.1155/2012/524169)

**SUPPLEMENTARY FIGURE 1.** Identification of *Fusicladium* sp. Morphological characteristics and total genomic DNA were taken from axenic culture of fungus with code number M2033-5-P30.

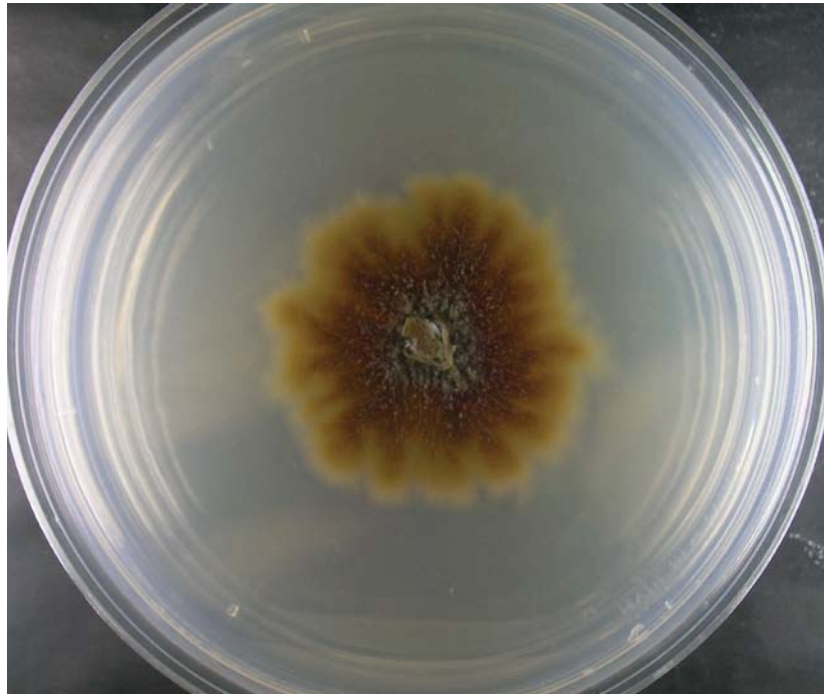

Supplement: f1 [file 524169.f1.pdf]
